# Supplementary material
Source: HighWire-hosted journal article supplement (https://www.cfp.ca/highwire/filestream/30340/field_highwire_adjunct_files/0/cas_Figs1-3.pdf)

Figure 1. Écran du site web d'Environnement Canada capté le 28 juin 2011 montrant des prévisions selon la cote air santé

## Cote air santé

### Toronto

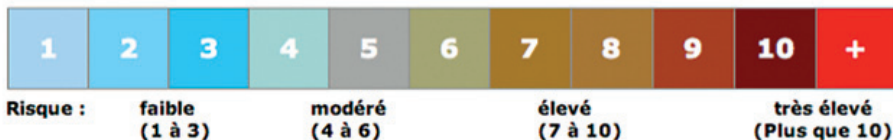

### Conditions actuelles

Observées à  
10h00 HAE mardi 28 juin  
2011

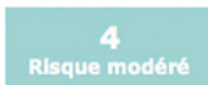

#### Population touchée :

- Envisagez de réduire ou de réorganiser les activités exténuantes en plein air si vous éprouvez des symptômes.
- [Déterminez si vous êtes vulnérable](#)

#### Population en général :

- Aucun besoin de modifier vos activités habituelles en plein air à moins d'éprouver des symptômes comme la toux et une irritation de la gorge.

### Maximums prévus

émis à 6h00 HAE mardi 28 juin 2011

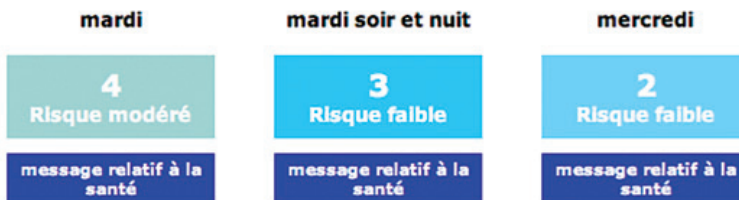

Cette figure est reproduite à partir du site web officiel du gouvernement du Canada; cette reproduction n'a pas été faite en affiliation avec le gouvernement ni a-t-elle reçu son aval.

Figure 2. Messages santé selon la cote air santé

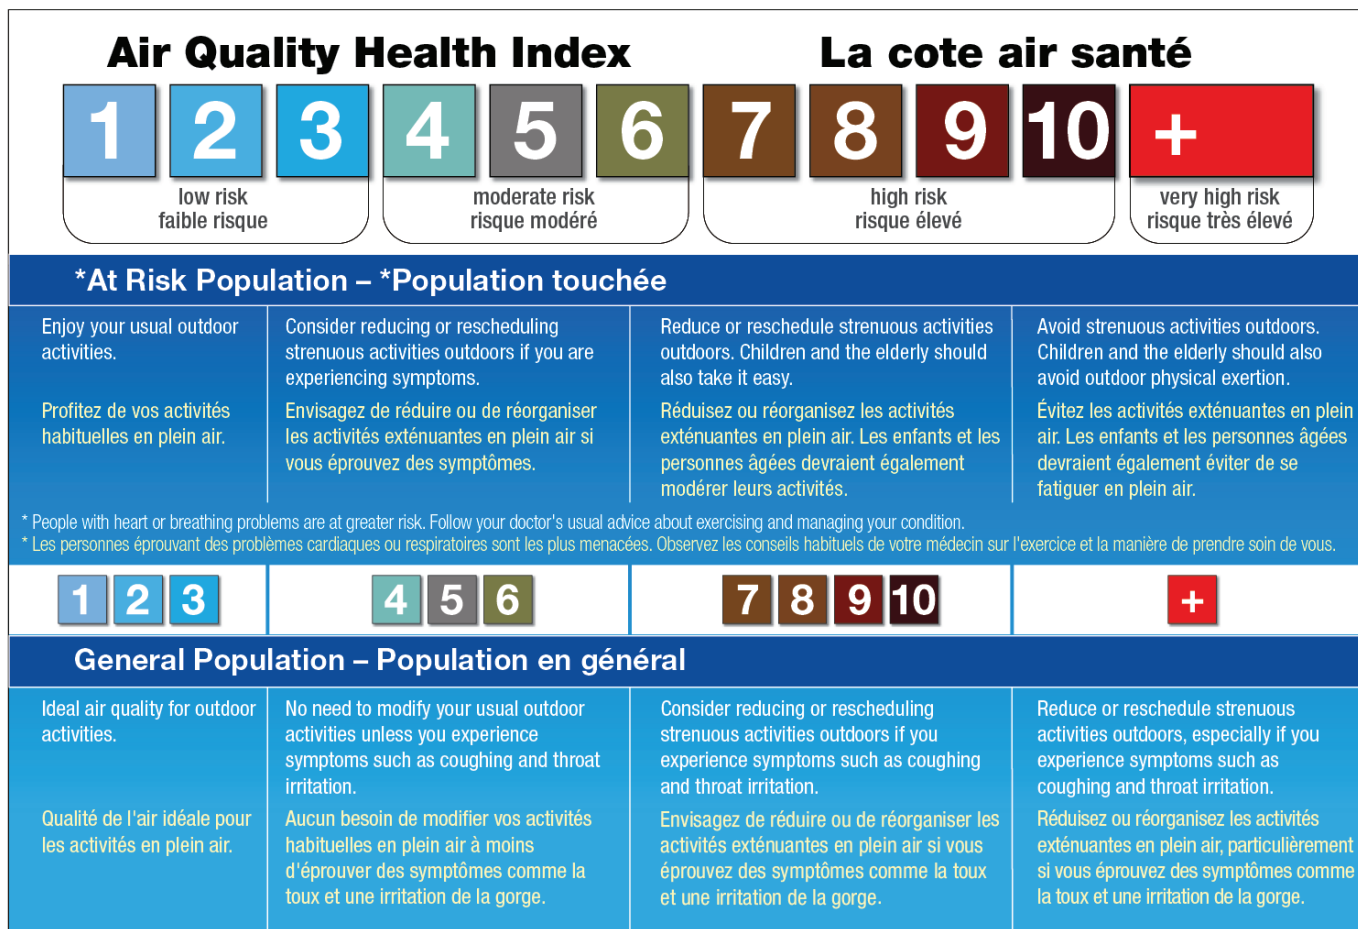

Cette figure est reproduite à partir de travaux officiels publiés par le gouvernement du Canada; cette reproduction n'a pas été faite en affiliation avec le gouvernement ni a-t-elle reçu son aval.

**Figure 3. Feuillet détachable sur la cote air santé**

Cette figure est reproduite à partir de travaux officiels publiés par le gouvernement du Canada; cette reproduction n'a pas été faite en affiliation avec le gouvernement ni a-t-elle reçu son aval.

# be **air** aware

The new Air Quality Health Index relates air quality to your health on a simple scale from 1 to 10.

## L'AIR en TÊTE

La cote air santé vous aide à comprendre les effets de la qualité de l'air sur votre santé en utilisant une simple échelle de 1 à 10.

### Air Quality Health Index



### La cote air santé



The **Air Quality Health Index** is designed to help you understand what air quality means for your health and make decisions to protect yourself by limiting exposure to air pollution by adjusting your outdoor activities when air pollution levels are high.

La **cote air santé** est facile à utiliser. Elle fait le lien entre la qualité de l'air et les risques pour la santé. Plus le nombre est bas, plus la qualité de l'air est bonne. Plus le nombre est élevé, plus les risques pour la santé sont élevés. Si vous prévoyez une activité à l'extérieur, vérifiez d'abord la cote air santé. Car lorsqu'on sait ce qu'elle représente pour nous, on respire mieux.

airhealth.ca



1
2
3

coteairsante.ca



4
5
6



7
8
9
10
+



Government  
of Canada

Gouvernement  
du Canada



Supplement: cas_Figs1-3.pdf [file cas_Figs1-3.pdf]
